# Supplementary material for: Multi-Omic Graph Diagnosis (MOGDx) : A data integration tool to perform classification tasks for heterogeneous diseases
Source: bioRxiv or medRxiv preprint supplement (doi:10.1101/2023.07.09.23292410), 2024-01-21
Supplement: Supplementary file [file media-1.pdf]

# Multi-Omic Graph Diagnosis (MOGDx) : A tool for the integration and classification of heterogeneous diseases

## Supplementary Figures

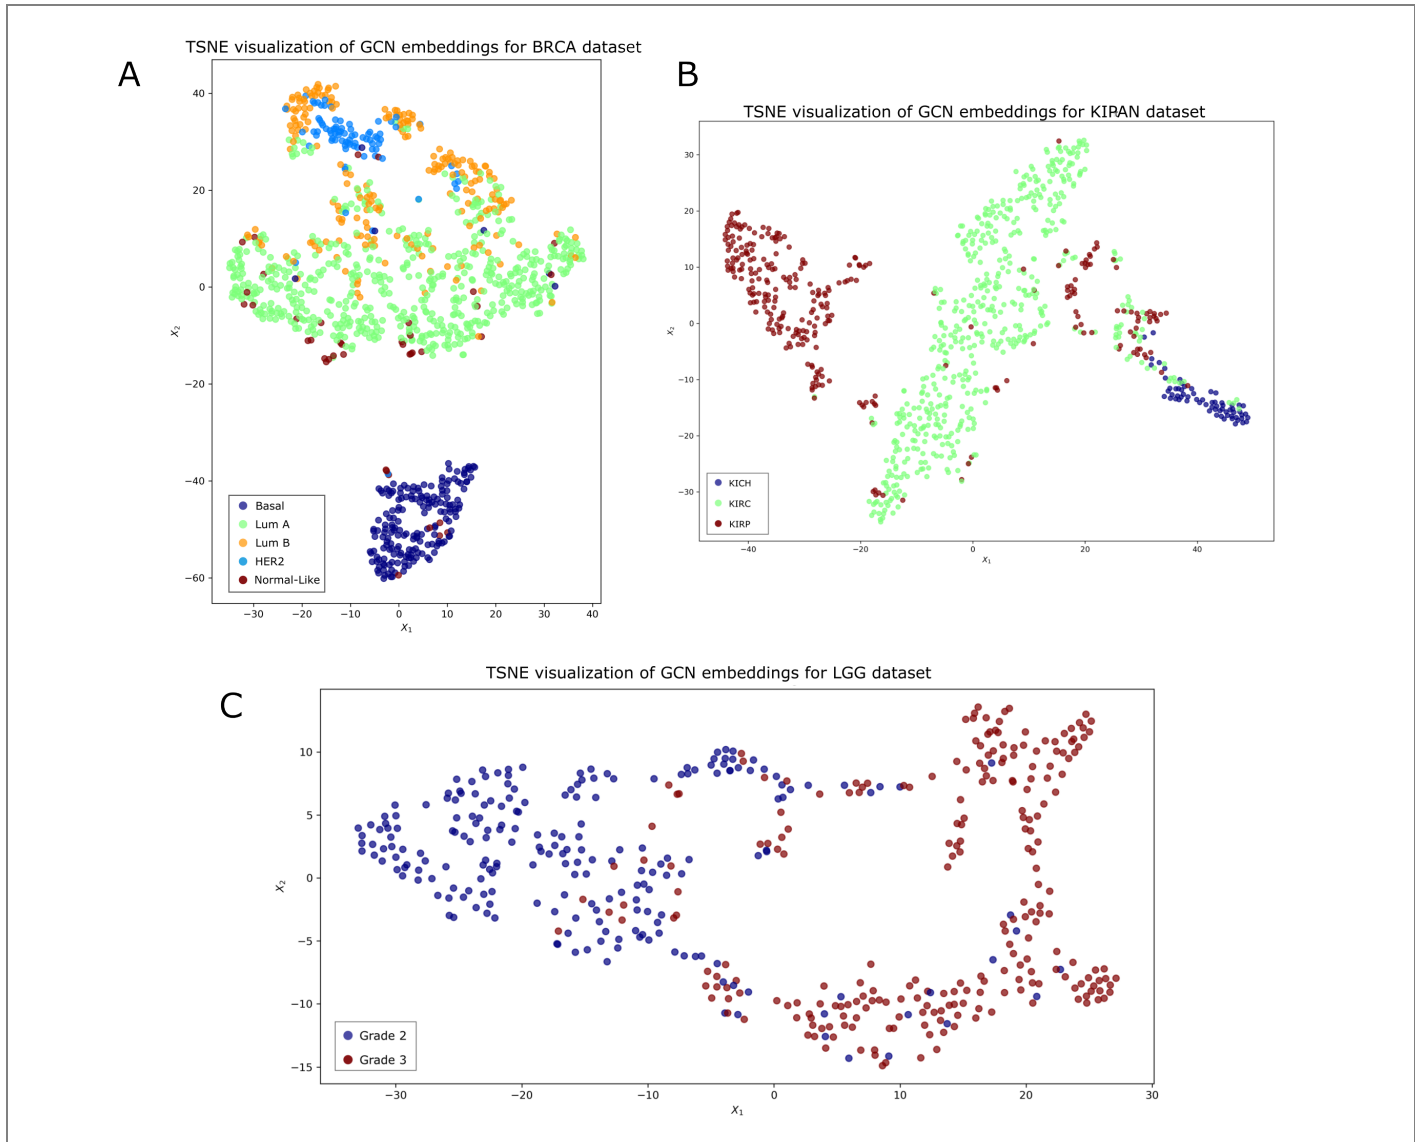

**Figure S1. GCN TSNE Plots** | The node embeddings learnt by the GCN model were visualised using TSNE plots. A shows the embeddings for the BRCA dataset, B for the KIPAN and C for the LGG datasets. These visualisations show the predictive power of the GCN and its ability to distinguish between classes.

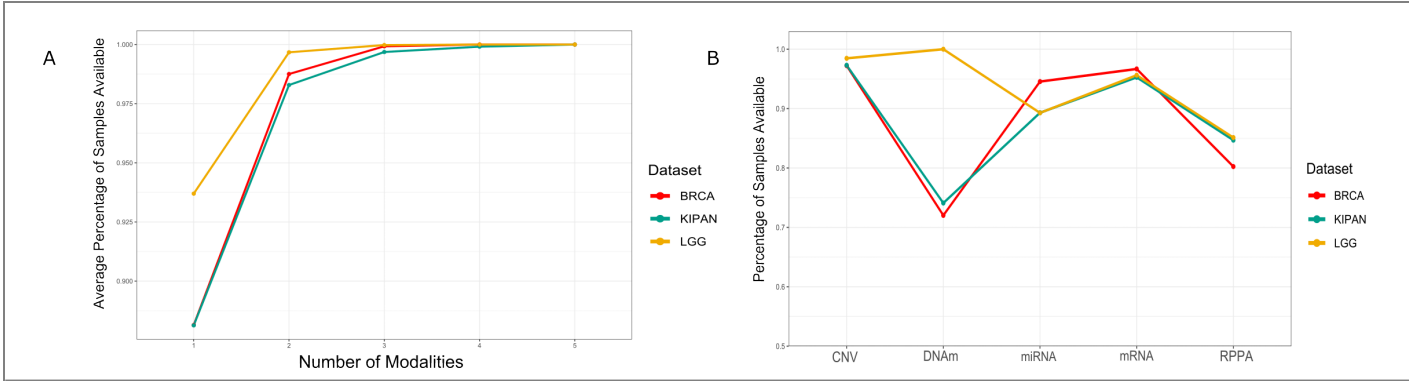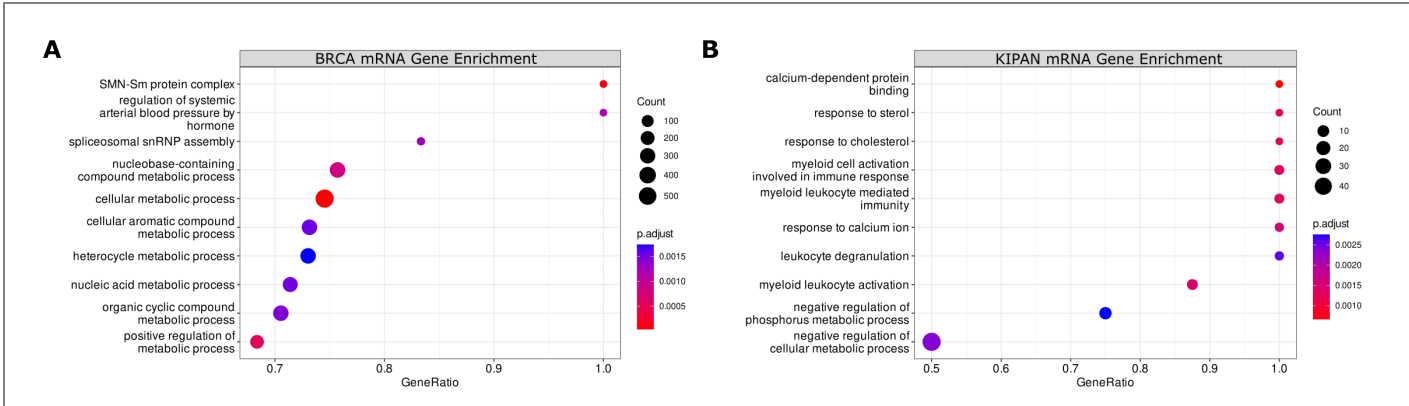

## Supplementary Tables

| Table S1. Performance of Different Features of MOGDx |       |       |       |       |       |       |          |       |       |
|------------------------------------------------------|-------|-------|-------|-------|-------|-------|----------|-------|-------|
|                                                      | PSN   |       |       | AE    |       |       | AE + PSN |       |       |
|                                                      | BRCA  | LGG   | KIPAN | BRCA  | LGG   | KIPAN | BRCA     | LGG   | KIPAN |
| Fold 1                                               | 0.843 | 0.889 | 0.955 | 0.802 | 0.582 | 0.972 | 0.853    | 0.882 | 0.938 |
| Fold 2                                               | 0.853 | 0.908 | 0.938 | 0.77  | 0.691 | 0.944 | 0.848    | 0.855 | 0.944 |
| Fold 3                                               | 0.871 | 0.849 | 0.927 | 0.797 | 0.724 | 0.944 | 0.866    | 0.882 | 0.927 |
| Fold 4                                               | 0.875 |       | 0.972 | 0.764 |       | 0.938 | 0.861    |       | 0.955 |
| Fold 5                                               | 0.866 |       | 0.972 | 0.829 |       | 0.983 | 0.87     |       | 0.944 |

Table S2 BRCA Integrated Modality Accuracies

| Dataset | Modality                         | Accuracy |
|---------|----------------------------------|----------|
| BRCA    | mRNA                             | 0.848    |
|         | miRNA                            | 0.758    |
|         | DNAm                             | 0.839    |
|         | CNV                              | 0.754    |
|         | RPPA                             | 0.779    |
|         | mRNA + miRNA                     | 0.841    |
|         | mRNA + DNAm                      | 0.867    |
|         | mRNA + CNV                       | 0.839    |
|         | mRNA + RPPA                      | 0.855    |
|         | miRNA + DNAm                     | 0.815    |
|         | miRNA + CNV                      | 0.768    |
|         | miRNA + RPPA                     | 0.811    |
|         | DNAm + CNV                       | 0.797    |
|         | DNAm + RPPA                      | 0.816    |
|         | CNV + RPPA                       | 0.789    |
|         | mRNA + miRNA + DNAm              | 0.854    |
|         | mRNA + miRNA + CNV               | 0.843    |
|         | mRNA + miRNA + RPPA              | 0.853    |
|         | mRNA + DNAm + CNV                | 0.835    |
|         | mRNA + DNAm + RPPA               | 0.865    |
|         | mRNA + CNV + RPPA                | 0.836    |
|         | miRNA + DNAm + CNV               | 0.817    |
|         | miRNA + DNAm + RPPA              | 0.848    |
|         | miRNA + CNV + RPPA               | 0.808    |
|         | DNAm + CNV + RPPA                | 0.823    |
|         | mRNA + miRNA + DNAm + CNV        | 0.861    |
|         | mRNA + miRNA + DNAm + RPPA       | 0.86     |
|         | mRNA + miRNA + CNV + RPPA        | 0.849    |
|         | mRNA + DNAm + CNV + RPPA         | 0.857    |
|         | miRNA + DNAm + CNV + RPPA        | 0.833    |
|         | mRNA + miRNA + DNAm + CNV + RPPA | 0.866    |

Table S3 LGG Integrated Modality Accuracies

| Dataset | Modality                         | Accuracy |
|---------|----------------------------------|----------|
| LGG     | mRNA                             | 0.682    |
|         | miRNA                            | 0.667    |
|         | DNAm                             | 0.875    |
|         | CNV                              | 0.644    |
|         | RPPA                             | 0.85     |
|         | mRNA + miRNA                     | 0.683    |
|         | mRNA + DNAm                      | 0.759    |
|         | mRNA + CNV                       | 0.676    |
|         | mRNA + RPPA                      | 0.705    |
|         | miRNA + DNAm                     | 0.829    |
|         | miRNA + CNV                      | 0.636    |
|         | miRNA + RPPA                     | 0.629    |
|         | DNAm + CNV                       | 0.757    |
|         | DNAm + RPPA                      | 0.829    |
|         | CNV + RPPA                       | 0.664    |
|         | mRNA + miRNA + DNAm              | 0.756    |
|         | mRNA + miRNA + CNV               | 0.672    |
|         | mRNA + miRNA + RPPA              | 0.695    |
|         | mRNA + DNAm + CNV                | 0.744    |
|         | mRNA + DNAm + RPPA               | 0.755    |
|         | mRNA + CNV + RPPA                | 0.668    |
|         | miRNA + DNAm + CNV               | 0.775    |
|         | miRNA + DNAm + RPPA              | 0.783    |
|         | miRNA + CNV + RPPA               | 0.687    |
|         | DNAm + CNV + RPPA                | 0.781    |
|         | mRNA + miRNA + DNAm + CNV        | 0.72     |
|         | mRNA + miRNA + DNAm + RPPA       | 0.72     |
|         | mRNA + miRNA + CNV + RPPA        | 0.687    |
|         | mRNA + DNAm + CNV + RPPA         | 0.755    |
|         | miRNA + DNAm + CNV + RPPA        | 0.753    |
|         | mRNA + miRNA + DNAm + CNV + RPPA | 0.739    |

Table S4 LGG Integrated Modality Accuracies

| Dataset | Modality                         | Accuracy |
|---------|----------------------------------|----------|
| KIPAN   | mRNA                             | 0.923    |
|         | miRNA                            | 0.95     |
|         | DNAm                             | 0.95     |
|         | CNV                              | 0.757    |
|         | RPPA                             | 0.975    |
|         | mRNA + miRNA                     | 0.931    |
|         | mRNA + DNAm                      | 0.949    |
|         | mRNA + CNV                       | 0.887    |
|         | mRNA + RPPA                      | 0.949    |
|         | miRNA + DNAm                     | 0.955    |
|         | miRNA + CNV                      | 0.88     |
|         | miRNA + RPPA                     | 0.955    |
|         | DNAm + CNV                       | 0.886    |
|         | DNAm + RPPA                      | 0.962    |
|         | CNV + RPPA                       | 0.901    |
|         | mRNA + miRNA + DNAm              | 0.952    |
|         | mRNA + miRNA + CNV               | 0.91     |
|         | mRNA + miRNA + RPPA              | 0.949    |
|         | mRNA + DNAm + CNV                | 0.925    |
|         | mRNA + DNAm + RPPA               | 0.953    |
|         | mRNA + CNV + RPPA                | 0.931    |
|         | miRNA + DNAm + CNV               | 0.924    |
|         | miRNA + DNAm + RPPA              | 0.964    |
|         | miRNA + CNV + RPPA               | 0.934    |
|         | DNAm + CNV + RPPA                | 0.931    |
|         | mRNA + miRNA + DNAm + CNV        | 0.936    |
|         | mRNA + miRNA + DNAm + RPPA       | 0.951    |
|         | mRNA + miRNA + CNV + RPPA        | 0.941    |
|         | mRNA + DNAm + CNV + RPPA         | 0.939    |
|         | miRNA + DNAm + CNV + RPPA        | 0.941    |
|         | mRNA + miRNA + DNAm + CNV + RPPA | 0.948    |

| Table S5. BRCA DNAm Enrichment per Subtype |              |         |         |       |      |
|--------------------------------------------|--------------|---------|---------|-------|------|
| Subtype                                    | Gene Name    | pval    | padj    | NES   | size |
| Basal                                      | CD44         | 4.8E-06 | 2.8E-02 | -3.59 | 9    |
|                                            | DUSP15       | 7.0E-04 | 3.0E-02 | -3.89 | 10   |
|                                            | PDK2         | 7.7E-04 | 3.0E-02 | -3.89 | 10   |
|                                            | USP10        | 3.0E-04 | 3.0E-02 | -2.99 | 6    |
|                                            | FIBCD1       | 4.2E-04 | 3.0E-02 | 2.40  | 17   |
| Her2                                       | CRIM1        | 6.9E-05 | 2.4E-02 | -5.43 | 25   |
|                                            | GRAMD4       | 6.2E-04 | 2.4E-02 | -5.11 | 21   |
|                                            | LOC100128788 | 2.5E-03 | 2.4E-02 | -4.63 | 16   |
|                                            | ERBB2        | 7.3E-05 | 2.4E-02 | -4.23 | 13   |
|                                            | STK32B       | 5.6E-05 | 2.4E-02 | -3.95 | 11   |
| LumA                                       | USP101       | 3.2E-08 | 1.8E-04 | 2.93  | 6    |
|                                            | CIT          | 3.5E-06 | 1.8E-03 | -6.41 | 33   |
|                                            | SMYD3        | 4.4E-06 | 1.8E-03 | -5.77 | 27   |
|                                            | H2AFY        | 8.4E-05 | 1.8E-03 | -3.50 | 8    |
|                                            | FAM3A        | 8.4E-05 | 1.8E-03 | -3.50 | 8    |
| LumB                                       | H2AFY1       | 1.1E-07 | 5.9E-04 | 3.47  | 8    |
|                                            | TNFAIP8      | 2.1E-07 | 5.9E-04 | 4.23  | 13   |
|                                            | GAB1         | 1.0E-06 | 1.9E-03 | -3.15 | 7    |
|                                            | PVT1         | 4.4E-05 | 5.1E-03 | -7.27 | 52   |
|                                            | GRK5         | 1.9E-05 | 5.1E-03 | -6.72 | 43   |
| Normal                                     | NDST1        | 8.3E-09 | 4.7E-05 | -3.52 | 9    |
|                                            | ZSWIM7       | 1.6E-08 | 4.7E-05 | -2.79 | 5    |
|                                            | TESSP1       | 3.2E-08 | 6.1E-05 | 2.74  | 5    |
|                                            | CRIM11       | 9.7E-08 | 1.4E-04 | -5.44 | 25   |
|                                            | E4F1         | 1.9E-07 | 2.2E-04 | 4.30  | 13   |

| Table S6. LGG DNAm Enrichment per Subtype |           |         |         |       |      |
|-------------------------------------------|-----------|---------|---------|-------|------|
| Subtype                                   | Gene Name | pval    | padj    | NES   | size |
| G2                                        | FLJ23834  | 1.2E-10 | 7.7E-07 | 4.27  | 13   |
|                                           | WIPF1     | 8.3E-07 | 2.2E-03 | -2.93 | 6    |
|                                           | SLC26A10  | 1.1E-06 | 2.2E-03 | 3.81  | 10   |
|                                           | SIM1      | 4.3E-04 | 3.0E-02 | -5.65 | 33   |
|                                           | BNC2      | 1.5E-03 | 3.0E-02 | -3.57 | 9    |
| G3                                        | BRUNOL4   | 6.6E-03 | 4.5E-02 | -6.12 | 43   |
|                                           | HGS       | 2.9E-02 | 4.5E-02 | -5.68 | 33   |
|                                           | FAT3      | 2.0E-02 | 4.5E-02 | -5.31 | 29   |
|                                           | ZNF783    | 2.7E-02 | 4.5E-02 | -5.31 | 29   |
|                                           | PDZD4     | 2.9E-02 | 4.5E-02 | -5.23 | 27   |

Table S7. KIPAN DNAm Enrichment per Subtype

| Subtype | Gene Name | pval  | padj  | NES   | size |
|---------|-----------|-------|-------|-------|------|
| KICH    | TCF12     | 4E-09 | 2E-05 | -3.17 | 6    |
|         | AHCYL2    | 3E-08 | 8E-05 | -4.32 | 12   |
|         | EEPD1     | 1E-07 | 2E-04 | -4.32 | 12   |
|         | FAM195A   | 1E-05 | 7E-04 | -3.61 | 8    |
|         | KRT8      | 1E-05 | 7E-04 | -3.61 | 8    |
| KIRC    | PTPRJ     | 4E-09 | 2E-05 | 4.44  | 14   |
|         | POLR1A    | 3E-07 | 6E-04 | -4.52 | 15   |
|         | KRT81     | 3E-07 | 6E-04 | 3.51  | 8    |
|         | FLNB      | 8E-07 | 1E-03 | 4.53  | 15   |
|         | SHMT2     | 2E-06 | 2E-03 | -4.81 | 17   |
| KIRP    | FLNB1     | 2E-06 | 5E-03 | -4.62 | 15   |
|         | FTO       | 6E-04 | 5E-03 | -4.45 | 14   |
|         | PTPRJ1    | 6E-04 | 5E-03 | -4.45 | 14   |
|         | TSC22D3   | 2E-04 | 5E-03 | -4.28 | 13   |
|         | MAPK8IP2  | 2E-04 | 5E-03 | -4.23 | 13   |
