# Supplementary material for: Multi-Omic Graph Diagnosis (MOGDx) : A data integration tool to perform classification tasks for heterogeneous diseases
Source: bioRxiv or medRxiv preprint supplement (doi:10.1101/2023.07.09.23292410), 2024-01-21
Supplement: Supplementary file [file media-1.pdf]

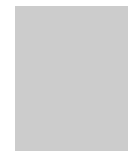

---

# Multi-Omic Graph Diagnosis (MOGDx) : A data integration tool to perform classification tasks for heterogeneous diseases

Barry Ryan<sup>1,\*</sup>, Riccardo E. Marioni<sup>2</sup> and T. Ian Simpson<sup>1</sup>

<sup>1</sup>School of Informatics, University of Edinburgh, 10 Crichton Street, EH8 9AB, Edinburgh, UK and <sup>2</sup>Centre for Genomic and Experimental Medicine, Institute of Genetics and Cancer, University of Edinburgh, Crewe Rd S, EH4 2XU, Edinburgh, UK

\*Corresponding author. [barry.ryan@ed.ac.uk](mailto:barry.ryan@ed.ac.uk)

FOR PUBLISHER ONLY Received on Date Month Year; revised on Date Month Year; accepted on Date Month Year

[Supplementary Figures](#)

[Supplementary Tables](#)

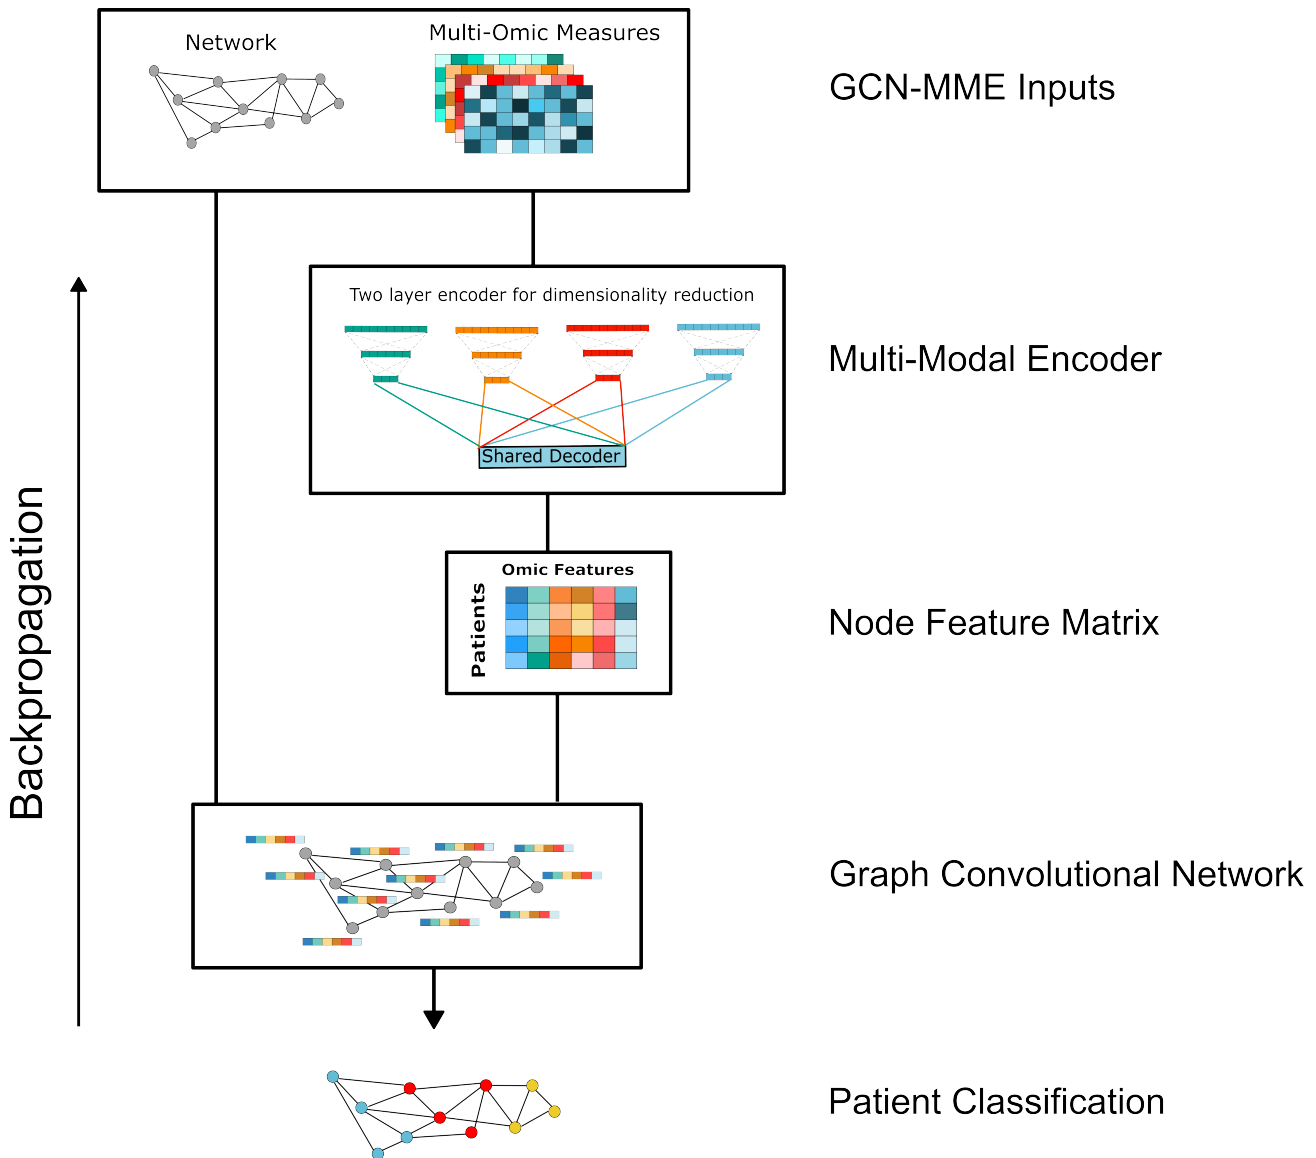

Fig. 1: Graph Convolutional Network - Multi-Modal Encoder Architecture

Table 1. Model Parameters for Optimal Performance on Each Dataset

| Dataset Model | MME Modality Reduced Dimension |       |      |     |      | Shared Decoder Dimension | GCN Dimension |
|---------------|--------------------------------|-------|------|-----|------|--------------------------|---------------|
|               | mRNA                           | miRNA | DNAm | CNV | RPPA |                          |               |
| BRCA          | 32                             | X     | 32   | 16  | 16   | 32                       | 32            |
| LGG           | X                              | X     | 32   | X   | X    | 32                       | 32            |
| KIPAN         | X                              | 16    | 32   | 16  | 16   | 64                       | 128           |

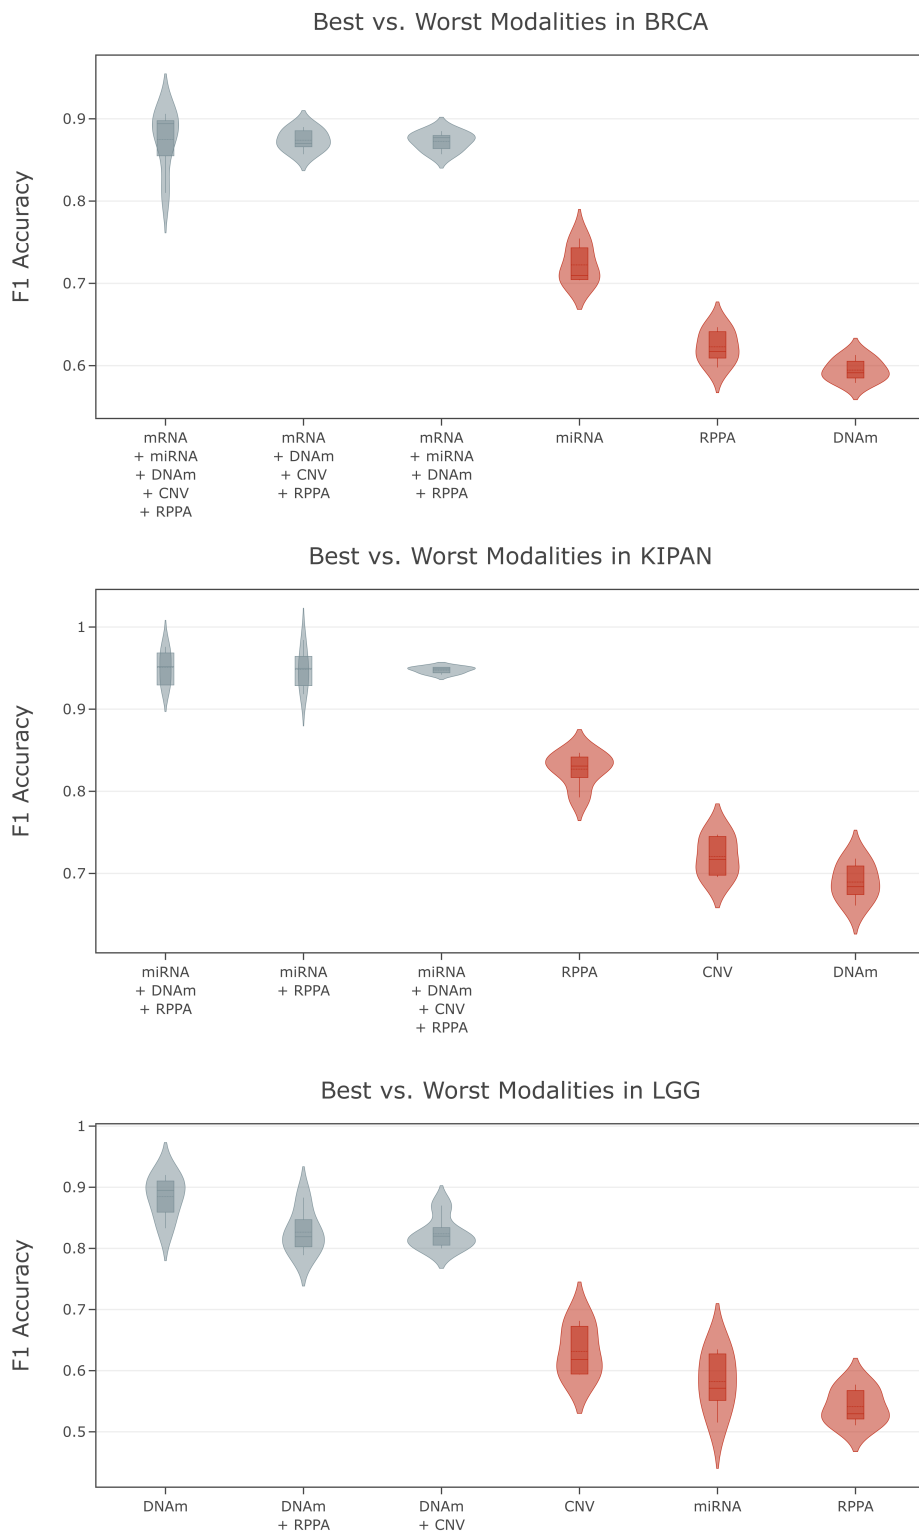

Fig. 2: Best and Worst Performing Modalities in Each Dataset

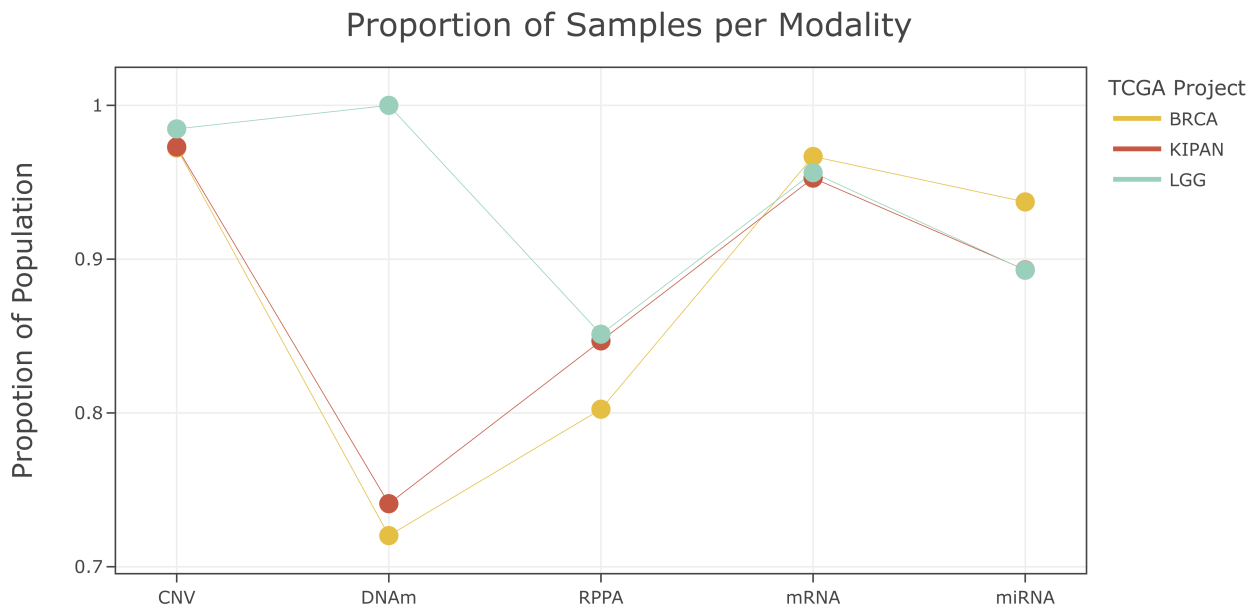

Fig. 3: Number of Samples per Modality in TCGA Datasets

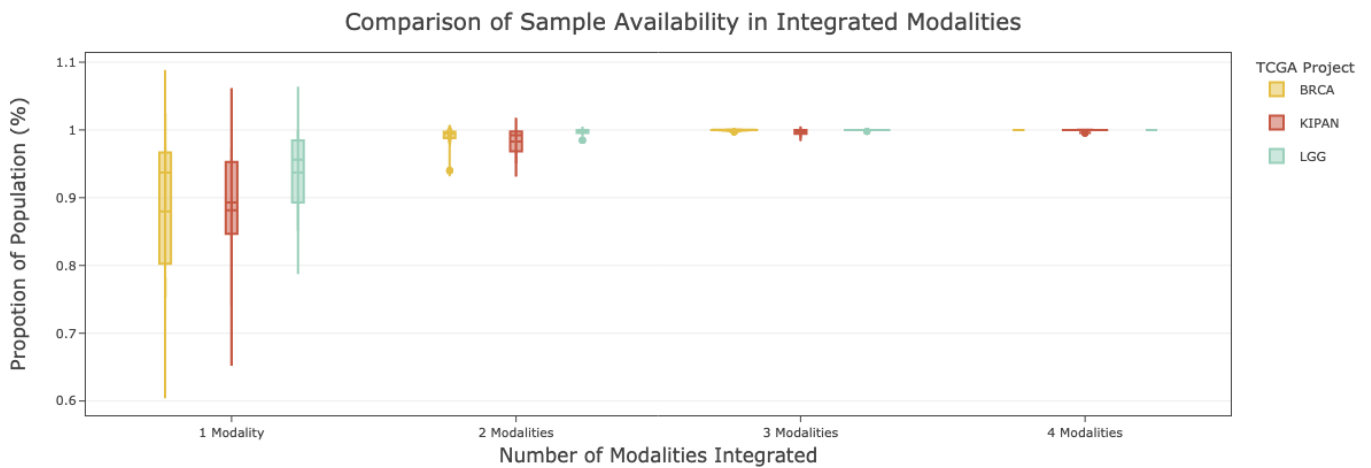

Fig. 4: Percentage of Samples Included when Integrating Modalities

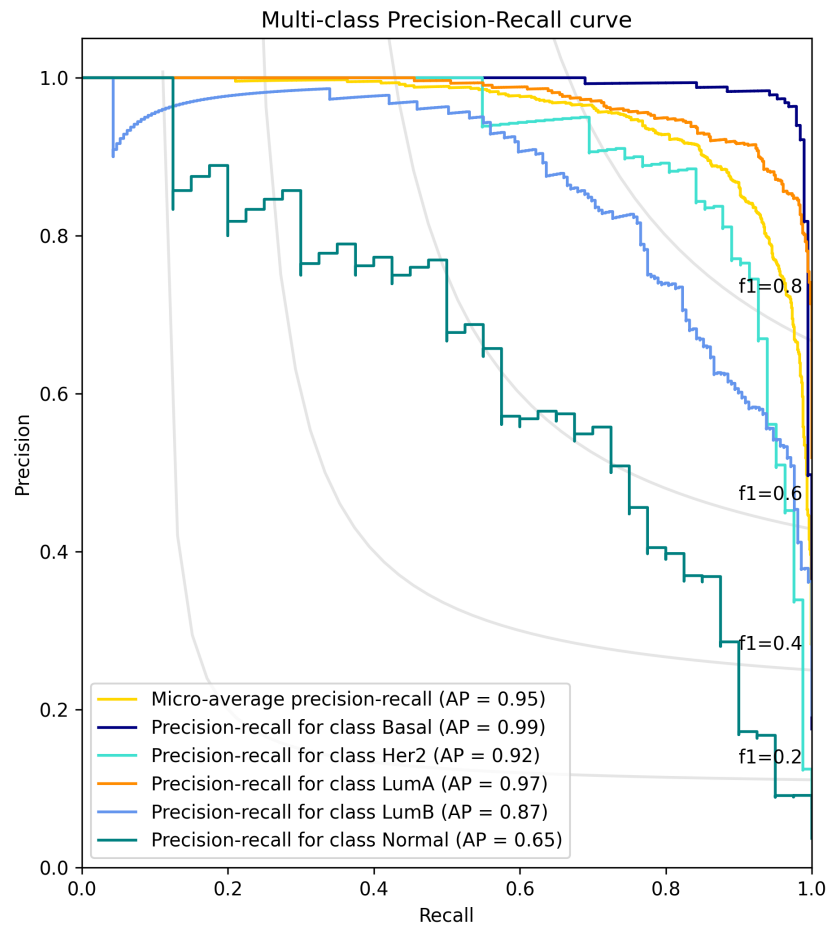

Fig. 5: BRCA Precision Recall Curve

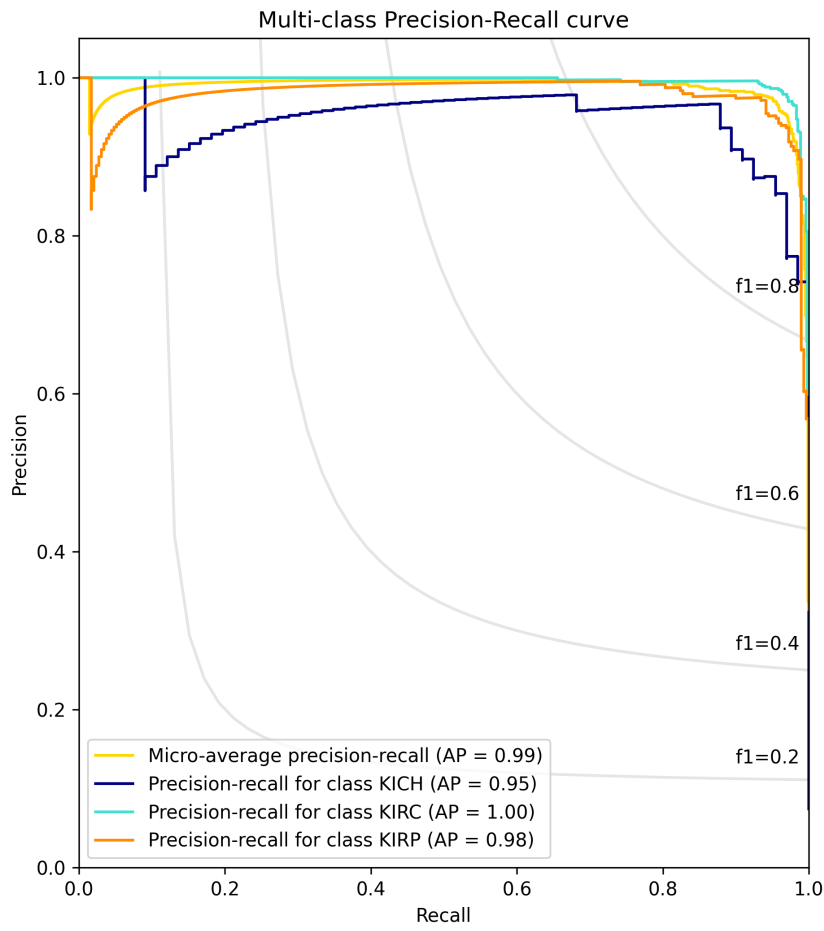

Fig. 6: KIPAN Precision Recall Curve

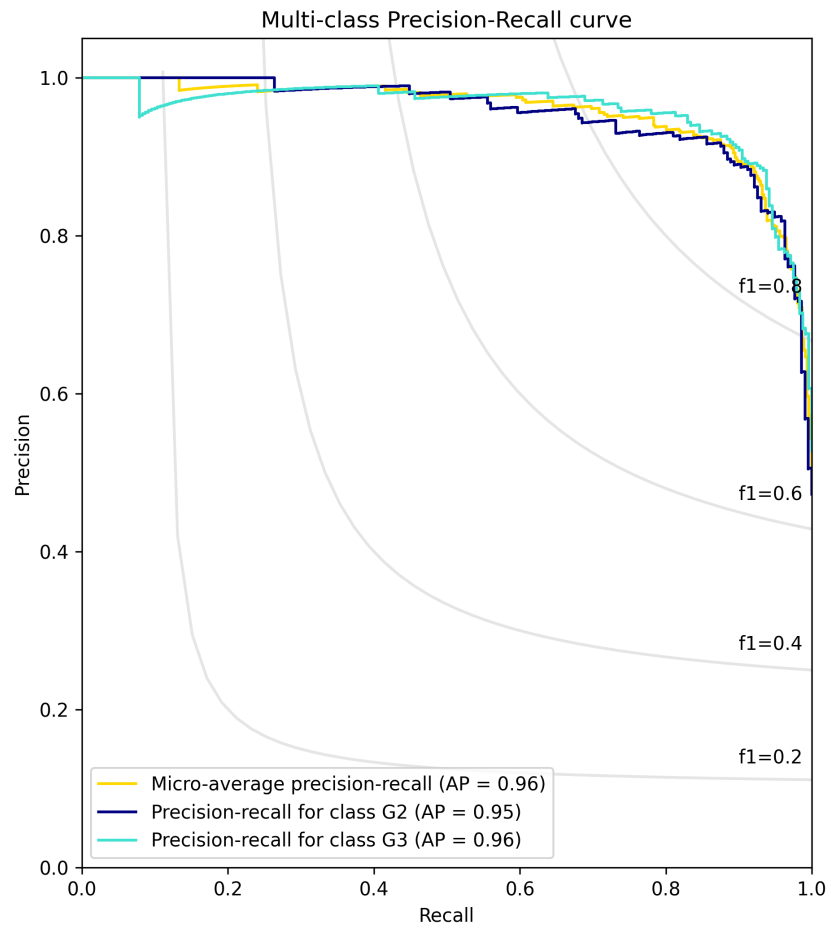

Fig. 7: LGG Precision Recall Curve

Table 2. KIPAN: Optimal Modality Performance Summary. These accuracies are not weighted by the percentage of sample availability.

| Project                          | Modality                   | Accuracy | F1   |
|----------------------------------|----------------------------|----------|------|
| KIPAN                            | CNV                        | 0.76     | 0.74 |
|                                  | DNAm                       | 0.95     | 0.93 |
|                                  | miRNA                      | 0.95     | 0.94 |
|                                  | RPPA                       | 0.98     | 0.98 |
|                                  | mRNA                       | 0.92     | 0.9  |
|                                  | miRNA + DNAm               | 0.95     | 0.94 |
|                                  | miRNA + CNV                | 0.89     | 0.87 |
|                                  | mRNA + RPPA                | 0.95     | 0.94 |
|                                  | mRNA + DNAm                | 0.94     | 0.92 |
|                                  | mRNA + miRNA               | 0.93     | 0.92 |
|                                  | mRNA + CNV                 | 0.9      | 0.88 |
|                                  | CNV + RPPA                 | 0.91     | 0.89 |
|                                  | DNAm + CNV                 | 0.88     | 0.86 |
|                                  | DNAm + RPPA                | 0.97     | 0.96 |
|                                  | miRNA + RPPA               | 0.97     | 0.96 |
|                                  | miRNA + DNAm + RPPA        | 0.97     | 0.96 |
|                                  | mRNA + miRNA + CNV         | 0.93     | 0.92 |
|                                  | mRNA + miRNA + DNAm        | 0.94     | 0.93 |
|                                  | mRNA + CNV + RPPA          | 0.95     | 0.94 |
|                                  | mRNA + miRNA + RPPA        | 0.96     | 0.94 |
|                                  | DNAm + CNV + RPPA          | 0.95     | 0.94 |
|                                  | miRNA + CNV + RPPA         | 0.95     | 0.94 |
|                                  | mRNA + DNAm + CNV          | 0.94     | 0.92 |
|                                  | miRNA + DNAm + CNV         | 0.94     | 0.93 |
|                                  | mRNA + DNAm + RPPA         | 0.96     | 0.94 |
|                                  | mRNA + miRNA + CNV + RPPA  | 0.95     | 0.94 |
|                                  | mRNA + miRNA + DNAm + CNV  | 0.95     | 0.94 |
|                                  | mRNA + miRNA + DNAm + RPPA | 0.96     | 0.95 |
| mRNA + DNAm + CNV + RPPA         | 0.96                       | 0.94     |      |
| miRNA + DNAm + CNV + RPPA        | 0.96                       | 0.95     |      |
| mRNA + miRNA + DNAm + CNV + RPPA | 0.96                       | 0.95     |      |



**Table 3.** LGG Optimal Modality Performance. These accuracies are not weighted by the percentage of sample availability.

| Project                          | Modality                   | Accuracy | F1   |
|----------------------------------|----------------------------|----------|------|
| LGG                              | CNV                        | 0.66     | 0.64 |
|                                  | DNAm                       | 0.90     | 0.88 |
|                                  | miRNA                      | 0.68     | 0.65 |
|                                  | RPPA                       | 0.65     | 0.64 |
|                                  | mRNA                       | 0.69     | 0.66 |
|                                  | miRNA + DNAm               | 0.84     | 0.82 |
|                                  | miRNA + CNV                | 0.68     | 0.66 |
|                                  | mRNA + RPPA                | 0.72     | 0.69 |
|                                  | mRNA + DNAm                | 0.77     | 0.74 |
|                                  | mRNA + miRNA               | 0.7      | 0.68 |
|                                  | mRNA + CNV                 | 0.72     | 0.69 |
|                                  | CNV + RPPA                 | 0.73     | 0.7  |
|                                  | DNAm + CNV                 | 0.85     | 0.82 |
|                                  | DNAm + RPPA                | 0.85     | 0.83 |
|                                  | miRNA + RPPA               | 0.67     | 0.65 |
|                                  | miRNA + DNAm + RPPA        | 0.81     | 0.78 |
|                                  | mRNA + miRNA + CNV         | 0.72     | 0.7  |
|                                  | mRNA + miRNA + DNAm        | 0.75     | 0.72 |
|                                  | mRNA + CNV + RPPA          | 0.72     | 0.7  |
|                                  | mRNA + miRNA + RPPA        | 0.69     | 0.68 |
|                                  | DNAm + CNV + RPPA          | 0.82     | 0.79 |
|                                  | miRNA + CNV + RPPA         | 0.7      | 0.67 |
|                                  | mRNA + DNAm + CNV          | 0.8      | 0.77 |
|                                  | miRNA + DNAm + CNV         | 0.82     | 0.8  |
|                                  | mRNA + DNAm + RPPA         | 0.76     | 0.74 |
|                                  | mRNA + miRNA + CNV + RPPA  | 0.7      | 0.69 |
|                                  | mRNA + miRNA + DNAm + CNV  | 0.79     | 0.76 |
|                                  | mRNA + miRNA + DNAm + RPPA | 0.78     | 0.75 |
|                                  | mRNA + DNAm + CNV + RPPA   | 0.79     | 0.76 |
|                                  | miRNA + DNAm + CNV + RPPA  | 0.79     | 0.76 |
| mRNA + miRNA + DNAm + CNV + RPPA | 0.77                       | 0.74     |      |

**Table 4.** BRCA Optimal Modality Performance. These accuracies are not weighted by the percentage of sample availability.

| Project                          | Modality                  | Accuracy | F1   |
|----------------------------------|---------------------------|----------|------|
| BRCA                             | CNV                       | 0.67     | 0.75 |
|                                  | DNAm                      | 0.84     | 0.83 |
|                                  | miRNA                     | 0.77     | 0.77 |
|                                  | RPPA                      | 0.8      | 0.78 |
|                                  | mRNA                      | 0.87     | 0.84 |
|                                  | miRNA + DNAm              | 0.82     | 0.81 |
|                                  | miRNA + CNV               | 0.78     | 0.77 |
|                                  | mRNA + RPPA               | 0.87     | 0.84 |
|                                  | mRNA + DNAm               | 0.88     | 0.86 |
|                                  | mRNA + miRNA              | 0.86     | 0.84 |
|                                  | mRNA + CNV                | 0.87     | 0.84 |
|                                  | CNV + RPPA                | 0.79     | 0.79 |
|                                  | DNAm + CNV                | 0.78     | 0.77 |
|                                  | DNAm + RPPA               | 0.83     | 0.82 |
|                                  | miRNA + RPPA              | 0.81     | 0.8  |
|                                  | miRNA + DNAm + RPPA       | 0.85     | 0.84 |
|                                  | mRNA + miRNA + CNV        | 0.87     | 0.85 |
|                                  | mRNA + miRNA + DNAm       | 0.88     | 0.86 |
|                                  | mRNA + CNV + RPPA         | 0.87     | 0.85 |
|                                  | mRNA + miRNA + RPPA       | 0.87     | 0.85 |
|                                  | DNAm + CNV + RPPA         | 0.84     | 0.82 |
|                                  | miRNA + CNV + RPPA        | 0.82     | 0.81 |
|                                  | mRNA + DNAm + CNV         | 0.88     | 0.86 |
|                                  | miRNA + DNAm + CNV        | 0.82     | 0.81 |
|                                  | mRNA + DNAm + RPPA        | 0.88     | 0.86 |
|                                  | mRNA + miRNA + CNV + RPPA | 0.88     | 0.86 |
|                                  | mRNA + miRNA + DNAm + CNV | 0.89     | 0.86 |
| mRNA + miRNA + DNAm + RPPA       | 0.89                      | 0.87     |      |
| mRNA + DNAm + CNV + RPPA         | 0.89                      | 0.87     |      |
| miRNA + DNAm + CNV + RPPA        | 0.85                      | 0.83     |      |
| mRNA + miRNA + DNAm + CNV + RPPA | 0.89                      | 0.88     |      |

Table 5. BRCA Component Performance Fold Summary

| BRCA   |           |       |          |       |          |       |
|--------|-----------|-------|----------|-------|----------|-------|
|        | PSN + MME |       | PSN      |       | MME      |       |
|        | Accuracy  | F1    | Accuracy | F1    | Accuracy | F1    |
| Fold 1 | 0.903     | 0.884 | 0.871    | 0.839 | 0.857    | 0.833 |
| Fold 2 | 0.894     | 0.870 | 0.88     | 0.85  | 0.829    | 0.795 |
| Fold 3 | 0.871     | 0.857 | 0.899    | 0.885 | 0.834    | 0.816 |
| Fold 4 | 0.889     | 0.869 | 0.907    | 0.886 | 0.843    | 0.82  |
| Fold 5 | 0.907     | 0.890 | 0.861    | 0.83  | 0.843    | 0.821 |

Table 6. LGG Component Performance Fold Summary

| LGG    |           |       |          |       |          |       |
|--------|-----------|-------|----------|-------|----------|-------|
|        | PSN + MME |       | PSN      |       | MME      |       |
|        | Accuracy  | F1    | Accuracy | F1    | Accuracy | F1    |
| Fold 1 | 0.924     | 0.907 | 0.902    | 0.882 | 0.721    | 0.718 |
| Fold 2 | 0.913     | 0.895 | 0.924    | 0.909 | 0.685    | 0.662 |
| Fold 3 | 0.857     | 0.833 | 0.912    | 0.896 | 0.703    | 0.674 |
| Fold 4 | 0.934     | 0.92  | 0.879    | 0.856 | 0.648    | 0.672 |
| Fold 5 | 0.89      | 0.868 | 0.901    | 0.883 | 0.681    | 0.652 |

Table 7. KIPAN Component Performance Fold Summary

| KIPAN  |           |       |          |       |          |       |
|--------|-----------|-------|----------|-------|----------|-------|
|        | PSN + MME |       | PSN      |       | MME      |       |
|        | Accuracy  | F1    | Accuracy | F1    | Accuracy | F1    |
| Fold 1 | 0.955     | 0.945 | 0.966    | 0.956 | 0.972    | 0.962 |
| Fold 2 | 0.961     | 0.949 | 0.966    | 0.956 | 0.972    | 0.964 |
| Fold 3 | 0.961     | 0.951 | 0.978    | 0.971 | 0.961    | 0.954 |
| Fold 4 | 0.96      | 0.951 | 0.955    | 0.943 | 0.994    | 0.993 |
| Fold 5 | 0.955     | 0.942 | 0.966    | 0.955 | 0.977    | 0.971 |

**Table 8.** TCGA DNAm Over Representation Analysis Results

| Dataset | Gene set             | Term                              | Overlap | P-value     | Adjusted P-value | Odds Ratio |
|---------|----------------------|-----------------------------------|---------|-------------|------------------|------------|
| BRCA    | MSigDB Hallmark 2020 | Estrogen Response Early           | 100/200 | 1.02445e-10 | 5.12225e-09      | 2.53256    |
|         |                      | Epithelial Mesenchymal Transition | 95/200  | 8.87321e-09 | 2.2183e-07       | 2.28852    |
|         |                      | Myogenesis                        | 91/200  | 2.20846e-07 | 3.68076e-06      | 2.10961    |
|         | KEGG 2021 Human      | Axon guidance                     | 103/182 | 1.7986e-15  | 5.71956e-13      | 3.3086     |
|         |                      | Proteoglycans in cancer           | 108/205 | 2.52725e-13 | 4.01832e-11      | 2.82438    |
| KIPAN   | MSigDB Hallmark 2020 | Pathways in cancer                | 227/531 | 9.28599e-13 | 7.96066e-11      | 1.90712    |
|         |                      | Estrogen Response Early           | 106/200 | 1.19312e-11 | 5.96561e-10      | 2.63818    |
|         |                      | Myogenesis                        | 98/200  | 1.62511e-08 | 4.06277e-07      | 2.24345    |
|         | KEGG 2021 Human      | Epithelial Mesenchymal Transition | 93/200  | 7.80117e-07 | 9.75147e-06      | 2.02706    |
|         |                      | Axon guidance                     | 110/182 | 2.22215e-17 | 7.04421e-15      | 3.58235    |
|         |                      | Proteoglycans in cancer           | 113/205 | 7.72699e-14 | 1.22473e-11      | 2.87735    |
|         |                      | Human papillomavirus infection    | 163/331 | 1.92237e-13 | 2.0313e-11       | 2.2797     |
| LGG     | MSigDB Hallmark 2020 | Estrogen Response Early           | 108/200 | 2.62026e-11 | 1.31013e-09      | 2.58899    |
|         |                      | Epithelial Mesenchymal Transition | 104/200 | 1.05084e-09 | 2.62711e-08      | 2.38698    |
|         |                      | Apical Junction                   | 98/200  | 1.47716e-07 | 2.46193e-06      | 2.11397    |
|         | KEGG 2021 Human      | Axon guidance                     | 113/182 | 1.28249e-17 | 4.0783e-15       | 3.62084    |
|         |                      | Focal adhesion                    | 121/201 | 3.05032e-17 | 4.85001e-15      | 3.34571    |
|         |                      | Proteoglycans in cancer           | 122/205 | 8.00606e-17 | 8.48642e-15      | 3.25124    |

**Table 9.** TCGA mRNA Gene Set Enrichment Analysis Results

| Dataset | Gene set             | Term                                         | ES        | NES      | NOM p-val | FDR q-val  | Tag %   | Gene % |
|---------|----------------------|----------------------------------------------|-----------|----------|-----------|------------|---------|--------|
| BRCA    | KEGG 2021 Human      | Pentose and glucuronate interconversions     | -0.774355 | -2.29015 | 0         | 0          | 10/16   | 9.58%  |
|         |                      | Cell cycle                                   | 0.573984  | 2.27577  | 0         | 0          | 48/108  | 16.26% |
|         |                      | Homologous recombination                     | -0.649829 | -2.39384 | 0         | 0          | 13/25   | 14.04% |
|         | MSigDB Hallmark 2020 | G2-M Checkpoint                              | 0.576235  | 2.46117  | 0         | 0          | 102/188 | 23.18% |
|         |                      | Androgen Response                            | -0.499048 | -2.03848 | 0         | 0.00577345 | 37/68   | 25.03% |
|         |                      | Myc Targets V1                               | 0.446703  | 1.88204  | 0         | 0.00801285 | 129/175 | 46.57% |
| LGG     | KEGG 2021 Human      | Nicotine addiction                           | 0.80602   | 3.10307  | 0         | 0          | 15/18   | 11.28% |
|         |                      | Systemic lupus erythematosus                 | -0.641083 | -2.29704 | 0         | 0          | 35/52   | 20.32% |
|         |                      | Type I diabetes mellitus                     | -0.737799 | -2.2463  | 0         | 0          | 19/24   | 15.40% |
|         | MSigDB Hallmark 2020 | G2-M Checkpoint                              | -0.672679 | -2.6506  | 0         | 0          | 53/126  | 8.53%  |
|         |                      | E2F Targets                                  | -0.641025 | -2.52297 | 0         | 0          | 66/137  | 15.34% |
|         |                      | Epithelial Mesenchymal Transition            | -0.621457 | -2.45649 | 0         | 0          | 94/144  | 23.64% |
| KIPAN   | KEGG 2021 Human      | Oxidative phosphorylation                    | 0.623763  | 3.14138  | 0         | 0          | 87/112  | 24.92% |
|         |                      | Pentose and glucuronate interconversions     | -0.668482 | -2.11695 | 0         | 0          | 11/24   | 10.08% |
|         |                      | Intestinal immune network for IgA production | -0.624027 | -2.15917 | 0         | 0          | 31/40   | 27.41% |
|         | MSigDB Hallmark 2020 | Oxidative Phosphorylation                    | 0.604961  | 3.25895  | 0         | 0          | 145/196 | 27.66% |
|         |                      | Allograft Rejection                          | -0.562653 | -2.43625 | 0         | 0          | 118/178 | 27.41% |
|         |                      | Epithelial Mesenchymal Transition            | -0.527188 | -2.26799 | 0         | 0          | 111/166 | 30.88% |
